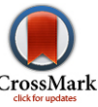

# Serum Progesterone Elevation Adversely Affects Cumulative Live Birth Rate in Different Ovarian Responders during *In Vitro* Fertilization and Embryo Transfer: A Large Retrospective Study

Zhiqin Bu<sup>1</sup>, Feifei Zhao<sup>1</sup>, Keyan Wang<sup>2</sup>, Yihong Guo<sup>1</sup>, Yingchun Su<sup>1</sup>, Jun Zhai<sup>1</sup>, Yingpu Sun<sup>1\*</sup>

**1** Reproductive Medical Center, First Affiliated Hospital of Zhengzhou University, People's Republic of China, **2** School of Public Health, Zhengzhou University, People's Republic of China

## Abstract

In order to explore the relationship between serum progesterone (P) level on the day of human chorionic gonadotrophin (HCG) administration and cumulative live birth rate in patients with different ovarian response during *in vitro* fertilization (IVF), we carried out this retrospective cohort study including a total of 4,651 patients undergoing their first IVF cycles from January 2011 to December 2012. All patients with a final live birth outcome (4,332 patients) were divided into three groups according to ovarian response: poor ovarian responder ( $\leq 5$  oocytes, 785 patients), intermediate ovarian responder (6–19 oocytes, 3065 patients) and high ovarian responder ( $\geq 20$  oocytes, 482 patients). The thresholds for serum P elevation were 1.60 ng/ml, 2.24 ng/ml, and 2.50 ng/ml for poor, intermediate, and high ovarian responders, respectively. Cumulative live birth rate per oocyte retrieval cycle was calculated in each group. The relationship between serum P level and cumulative live birth rate was evaluated by both univariate and multivariate logistic regression analysis. Cumulative live birth rate per oocyte retrieval cycle was inversely associated with serum P level in patients with different ovarian response. For all responders, patients with elevated P level had significantly higher number of oocytes retrieved, but lower high quality embryo rate, and lower cumulative live birth rate compared with patients with normal serum P level. In addition, serum P level adversely affected cumulative live birth rate by both univariate and multivariate logistic regression analysis, independent of ovarian response. Serum P elevation on the day of HCG administration adversely affects cumulative live birth rate per oocyte retrieval cycle in patients with different ovarian response.

**Citation:** Bu Z, Zhao F, Wang K, Guo Y, Su Y, et al. (2014) Serum Progesterone Elevation Adversely Affects Cumulative Live Birth Rate in Different Ovarian Responders during *In Vitro* Fertilization and Embryo Transfer: A Large Retrospective Study. PLoS ONE 9(6): e100011. doi:10.1371/journal.pone.0100011

**Editor:** Qing-Yuan Sun, Institute of Zoology, Chinese Academy of Sciences, China

**Received:** April 9, 2014; **Accepted:** May 19, 2014; **Published:** June 13, 2014

**Copyright:** © 2014 Bu et al. This is an open-access article distributed under the terms of the Creative Commons Attribution License, which permits unrestricted use, distribution, and reproduction in any medium, provided the original author and source are credited.

**Data Availability:** The authors confirm that all data underlying the findings are fully available without restriction. N/A.

**Funding:** This work was supported by the National Natural Science Foundation of China (Grant NO. 31271605 and U1304315) and Youth Foundation of The First Affiliated Hospital of Zhengzhou University. The funders had no role in study design, data collection and analysis, decision to publish, or preparation of the manuscript.

**Competing Interests:** The authors have declared that no competing interests exist.

\* E-mail: syp2008@vip.sina.com

## Introduction

The relationship between serum progesterone (P) level on the day of human chorionic gonadotropin (HCG) administration and outcome of *in vitro* fertilization (IVF)/intracytoplasmic sperm injection (ICSI) and embryo transfer (ET) has been controversial for several decades [1,2,3,4,5,6]. Most studies have evaluated the association between serum P level and clinical outcome in fresh IVF/ICSI cycles, and advocated that serum P elevation on the day of HCG administration may adversely affect clinical outcome by jeopardizing endometrial receptivity [7,8,9]. However, embryo cryopreservation is now in common use all over the world, giving clinicians the opportunity to use surplus embryos in frozen-thawed embryo transfer (FET) cycles. Thus, many fertility centers suggest their patients with serum P elevation to wait for embryo transfer in next FET cycles. Since the frozen embryos are also produced in fresh cycles, in order to evaluate the impact of serum P elevation on outcome of an IVF/ICSI cycle, it would be more logical to consider the cumulative live birth rate from the fresh and all FET

cycles combined, instead of merely looking at the single fresh cycle outcome.

Another question to address is the relationship between serum P level and ovarian response. Recent studies have shown that serum P level is positively associated with ovarian response [10,11]. Thus, it is reasonable and important to assess the relationship between serum P level and IVF/ICSI outcome according to different ovarian response.

Therefore, the purpose of the present study is to investigate the relationship between serum P level on the day of HCG administration during IVF/ICSI and the cumulative live birth rate per oocyte retrieval cycle in patients with different ovarian response.

## Materials and Methods

### Patients

This retrospective cohort study included 4,651 patients undergoing their first IVF/ICSI cycles carried out between January

**Table 1.** Basic characteristics of the 4,651 patients undergoing their first IVF/ICSI cycle.

| Parameter                                 | n = 4651     |
|-------------------------------------------|--------------|
| Age (y)                                   | 30.82±4.78   |
| BMI (kg/m <sup>2</sup> )                  | 22.25±3.06   |
| Duration of infertility (y)               | 4.75±3.72    |
| Basal FSH (IU/L)                          | 7.76±2.74    |
| Infertility diagnosis                     |              |
| Tubal factor                              | 1149 (24.7%) |
| Ovulation disorder                        | 818 (17.6%)  |
| Endometriosis, pelvic and uterine factors | 1052 (22.6%) |
| Diminished ovarian reserve                | 172 (3.7%)   |
| Male factor                               | 1223 (26.3%) |
| Unexplained and other                     | 237 (5.1%)   |
| Protocols                                 |              |
| Standard long protocol                    | 3923 (84.3%) |
| (Modified)Super-long protocol             | 278 (6.0%)   |
| GnRH-antagonist/short/protocol            | 450 (9.7%)   |
| Live birth outcome                        |              |
| Yes-≥1 live birth babies                  | 2518         |
| No-no embryo left                         | 1814         |
| No-≥1 embryos left                        | 300          |
| No-ongoing pregnancy                      | 19           |

Note: values are the mean ± SD unless otherwise noted. BMI, body mass index; FSH, follicular stimulation hormone; GnRH, gonadotropin releasing hormone. doi:10.1371/journal.pone.0100011.t001

2011 and December 2012 at the Reproductive Medicine Center, First Affiliated Hospital of Zhengzhou University, China. Cycles carried out for pre-implantation genetic diagnosis (PGD) or those with donor gametes were excluded from this analysis. All patients signed written informed consent. Institutional Review Board of First Affiliated Hospital of Zhengzhou University approved this study.

### Controlled ovarian hyperstimulation protocols

Pituitary down-regulation was performed with a standard long GnRH agonist protocol, (modified) super long GnRH agonist protocol, or GnRH antagonist protocol, as shown in previous studies [12,13]. The selection of the protocol and the dose of gonadotrophin were individualized according to each patient's basic information and clinician's preference.

Embryo quality evaluation was done on the cleavage stage. The grading criteria were described somewhere else [14]. Grade 1 and grade 2 embryos were considered to be high quality embryos. Embryo transfer took place between 2 and 6 days after oocyte retrieval. The number of embryos transferred complied with national regulations and patient's ovarian response and requests. A maximum of three embryos can be transferred.

Cryopreservation was performed 3–6 days after oocyte retrieval. The details of the freezing and thawing protocols in our center were reported previously [15].

The definitions of some clinical parameters in this study are shown as follows: Fertilization rate = number of 2 PN (pronuclear)/number of oocytes retrieved. Available embryo rate = number of available embryos/number of oocytes retrieved.

**Table 2.** The relationship between serum P level on day of HCG administration and patient's basic and clinical characteristics in 4,651 patients.

| Parameter                   | Pearson Correlation | P value |
|-----------------------------|---------------------|---------|
| Age (y)                     | 0.000               | 0.975   |
| BMI (Kg/m <sup>2</sup> )    | -0.071              | 0.000   |
| Duration of infertility (y) | 0.019               | 0.206   |
| Basal FSH (IU/L)            | -0.143              | 0.000   |
| Gn duration (days)          | 0.003               | 0.822   |
| Gn dosage (IU)              | 0.092               | 0.000   |
| Peak E <sub>2</sub> (pg/ml) | 0.407               | 0.000   |
| Peak LH (IU/L)              | -0.041              | 0.006   |
| No. of retrieved oocytes    | 0.269               | 0.000   |

Note: BMI, body mass index; FSH, follicular stimulation hormone; Gn, gonadotropin; E<sub>2</sub>, estrogen; LH, luteinizing hormone. doi:10.1371/journal.pone.0100011.t002

High quality rate = number of high quality embryos/number of oocytes retrieved.

### Data Collection

Data were obtained from computerized databases. Patient characteristics were evaluated, including age, body mass index (BMI), infertility diagnosis, infertility duration, and basal serum follicular stimulation hormone (FSH) level. Other parameters obtained from each cycle were also recorded, including total duration and dose of gonadotropins, peak serum estradiol level, luteinizing hormone (LH) level, and P level on the day of HCG administration; oocytes obtained per cycle, fertilization rate, number of available embryos, number of high quality embryos, and live births. The primary outcome was the cumulative live birth in the fresh and all FET cycles combined following the same index stimulation cycle.

### Statistical analysis

Patients were categorized into three groups based on ovarian response: poor ovarian responder (≤5 oocytes obtained), intermediate ovarian responder (6–19 oocytes obtained), and high ovarian responder (≥20 oocytes obtained). In all the three ovarian response groups, patients were then divided into six distinct groups based on serum P level on the day of HCG administration: ≤0.49, 0.50–0.99, 1.00–1.49, 1.50–1.99, 2.00–2.49, and ≥2.50 ng/mL. Serum P elevation on the day of HCG administration was defined as cumulative 95% of P level in each ovarian response group: poor ovarian responder (≥1.60 ng/mL), intermediate ovarian responder (≥2.24 ng/mL), and high ovarian responder (≥2.50 ng/mL).

Cumulative live birth rate was calculated for each P interval. The spearman order correlation coefficients were used to determine the relationship between serum P level and patient basic characteristics. Demographic and clinical characteristics in groups with and without P elevation were compared using Student T test and Chi-square test, as appropriate. Univariate logistic regression analysis was used to explore the association between all factors and cumulative live birth. And those having significant association with cumulative live birth by univariate analysis were included into multivariate logistic regression for further analysis.

Statistical analysis was carried out using the Statistical Program for Social Sciences (SPSS Inc., Version 17.0, Chicago, IL, USA). In all cases, the value of  $P < 0.05$  was considered statistically significant.

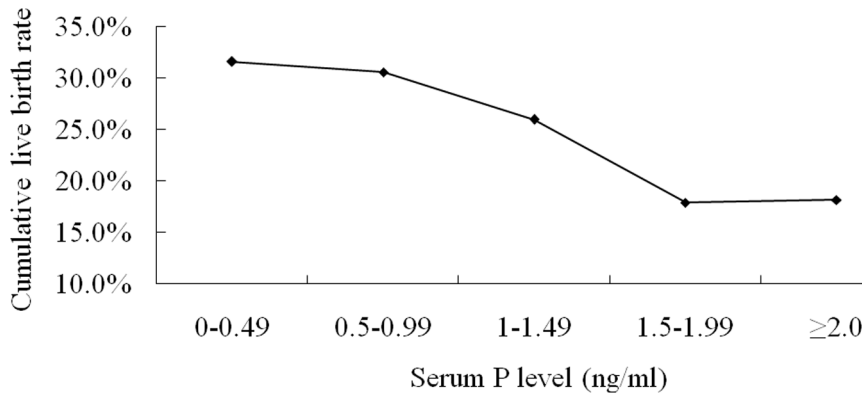

**Figure 1.** Relationship between serum P level on the day of HCG administration and cumulative live birth rate per oocyte retrieval cycle in poor ovarian responders (retrieved oocytes ≤5). doi:10.1371/journal.pone.0100011.g001

**Results**

**Patient Characteristics**

The patients’ basic information is summarized in Table 1. In the 4,651 patients undergoing their first IVF/ICSI cycles, 4,332 patients had a final cumulative live birth outcome (2,518 patients reached a live birth, and 1,814 patients did not and had no embryos left). The overall cumulative live birth rate in these 4,332 patients was 58.18%.

Table 2 shows the relationship between serum P level on day of HCG administration and patient’s basic and clinical parameters. Basing on simple regression analysis of the pooled data, serum P level was most positively correlated with number of oocytes retrieved ( $r=0.27$ ,  $P=0.00$ ), serum  $E_2$  level on day of HCG administration ( $r=0.41$ ,  $P=0.00$ ).

**Poor ovarian responders**

Figure 1 shows the association between cumulative live birth rate and serum P level in poor ovarian responders ( $n=785$ ). Cumulative live birth rate negatively associated with serum P level, and dropped dramatically when serum  $P \geq 1.50$  ng/mL. Compared with patients in serum P elevation ( $P \geq 1.50$  ng/mL) group, those with serum P non-elevation ( $P < 1.50$  ng/mL) had significantly higher FSH levels, and lower peak  $E_2$  levels. Meanwhile, number of oocytes retrieved was lower in non-elevation group, even though the difference did not reach statistical significant. However, the results show that number of high quality embryos, available embryo rate, high quality embryo rate, and cumulative live birth rate were higher in the non-elevation group than those in the serum P elevation group (Table 3).

Univariate logistic regression showed that patient age, duration of infertility, basal FSH, number of oocytes retrieved, fertilization

**Table 3.** Patients’ characteristics and cycle outcomes in poor ovarian responders (retrieved oocytes ≤5) with and without P elevation ( $\geq 1.6$  ng/ml) on day of HCG administration.

|                                | Non-elevated P (n = 747) | Elevated P (n = 38) | P value |
|--------------------------------|--------------------------|---------------------|---------|
| Age (y)                        | 33.8±5.2                 | 31.6±5.0            | 0.011   |
| BMI (Kg/m <sup>2</sup> )       | 22.3±3.0                 | 21.5±2.5            | NS      |
| Duration of infertility (y)    | 5.8±4.2                  | 5.6±4.1             | NS      |
| Basal FSH (IU/L)               | 9.7±4.3                  | 8.3±2.4             | 0.002   |
| Gn duration (days)             | 11.43±2.8                | 11.42±2.6           | NS      |
| Gn dosage (IU)                 | 2868±1135                | 2917±1355           | NS      |
| Peak $E_2$ (pg/ml)             | 2220±1306                | 3118±1588           | 0.000   |
| Peak LH (IU/L)                 | 2.6±2.3                  | 4.0±7.6             | NS      |
| No. of retrieved oocytes       | 3.44±1.3                 | 3.79±2.25           | NS      |
| Fertilization rate (%)         | 71.1±26.9                | 66.5±29.8           | NS      |
| No. of available embryos       | 2.1±1.1                  | 1.8±1.1             | NS      |
| No. of high quality embryos    | 1.8±1.1                  | 1.3±0.8             | 0.010   |
| Available embryo rate (%)      | 64.3±27.9                | 50.4±26.9           | 0.003   |
| High quality embryo rate (%)   | 55.0±31.3                | 38.4±27.2           | 0.001   |
| Cumulative live birth rate (%) | 227/747 (30.4)           | 7/38 (18.4)         | NS      |

Note: values are the mean ± SD unless otherwise noted. NS, not significant. BMI, body mass index; FSH, follicular stimulation hormone; Gn, gonadotropin;  $E_2$ , estrogen; LH, luteinizing hormone. doi:10.1371/journal.pone.0100011.t003

**Table 4.** Factors associated with cumulative live birth rate in different ovarian responders by logistic regression.

|                              | Poor ovarian responders |                    | Intermediate ovarian responders |                    | High ovarian responders |                   |
|------------------------------|-------------------------|--------------------|---------------------------------|--------------------|-------------------------|-------------------|
|                              | COR (95% CI)            | AOR (95% CI)       | COR (95% CI)                    | AOR (95% CI)       | COR (95% CI)            | AOR (95% CI)      |
| Age (y)                      | 0.88 (0.85–0.91)**      | 0.89 (0.85–0.93)** | 0.92 (0.90–0.93)**              | 0.94 (0.92–0.96)** | 0.98 (0.93–1.04)        |                   |
| BMI (Kg/m <sup>2</sup> )     | 0.99 (0.94–1.05)        |                    | 0.97 (0.95–1.00)                |                    | 1.07 (0.99–1.15)        |                   |
| Duration of infertility (y)  | 0.90 (0.86–0.94)**      | 0.92 (0.87–0.98)** | 0.92 (0.90–0.94)**              | 0.96 (0.94–0.99)** | 0.91 (0.84–0.97)**      | 0.91 (0.84–0.98)* |
| Basal FSH (IU/L)             | 0.96 (0.92–1.00)*       |                    | 0.95 (0.92–0.98)**              |                    | 1.05 (0.92–1.21)        |                   |
| Gn duration (days)           | 0.97 (0.92–1.03)        |                    | 0.95 (0.92–0.99)*               |                    | 0.96 (0.85–1.10)        |                   |
| Gn dosage (IU)               | 1.00 (0.99–1.00)        |                    | 1.00 (0.99–1.00)                |                    | 1.00 (0.99–1.00)        |                   |
| Peak E <sub>2</sub> (pg/ml)  | 1.00 (1.00–1.00)        |                    | 1.00 (1.00–1.00)                |                    | 1.00 (1.00–1.00)        |                   |
| Peak LH (IU/L)               | 0.98 (0.92–1.04)        |                    | 1.04 (0.98–1.11)                |                    | 1.01 (0.74–1.38)        |                   |
| No. of retrieved oocytes     | 1.45 (1.28–1.65)**      |                    | 1.08 (1.06–1.11)**              |                    | 1.02 (0.98–1.07)        |                   |
| Fertilization rate (%)       | 2.14 (1.20–3.84)**      |                    | 4.58 (3.06–6.85)**              |                    | 21.1 (5.4–82.6)**       |                   |
| No. of available embryos     | 1.89 (1.63–2.20)**      |                    | 1.23 (1.19–1.26)**              |                    | 1.14 (1.08–1.20)**      |                   |
| No. of high quality embryos  | 1.96 (1.68–2.28)**      |                    | 1.26 (1.23–1.30)**              | 1.26 (1.05–1.50)*  | 1.15 (1.10–1.21)**      |                   |
| Available embryo rate (%)    | 2.96 (1.69–5.20)**      |                    | 10.34 (7.2–14.9)**              |                    | 30.6 (8.7–107.0)**      |                   |
| High quality embryo rate (%) | 2.97 (1.80–4.90)**      |                    | 12.8 (9.0–18.2)**               |                    | 36.0 (10.5–123)**       |                   |
| P level on the day of HCG    | 0.75 (0.56–1.00)*       | 0.60 (0.40–0.89)*  | 0.75 (0.67–0.84)**              | 0.76 (0.67–0.86)** | 0.65 (0.48–0.88)**      | 0.66 (0.47–0.92)* |

Note: BMI, body mass index; FSH, follicular stimulation hormone; Gn, gonadotropin; E<sub>2</sub>, estrogen; LH, luteinizing hormone; HCG, human chorionic gonadotropin; COR, crude odds ratio; AOR, adjusted odds ratio; CI, confidence interval.

\* P<0.05.

\*\* P<0.01.

doi:10.1371/journal.pone.0100011.t004

rate, number of available embryos, number of high quality embryos, available embryo rate, high quality embryo rate, and serum P level on the day of HCG administration were significantly associated with cumulative live birth rate in poor ovarian responders. However, after controlling for related factors in multivariate logistic regression analysis, only patient age, duration of infertility, and serum P level were associated with cumulative live birth rate (Table 4).

**Intermediate ovarian responders**

The relationship between cumulative live birth rate and serum P level in intermediate ovarian responders (n = 3,065) was shown in Figure 2. There was a reduction in cumulative live birth rate with progressively greater concentrations of serum P level.

Compared with patients in non-elevation (P<2.24 ng/mL), those with P level elevation (P≥2.24 ng/mL) had significantly higher peak E<sub>2</sub> levels, number of oocytes retrieved, and number of available embryos. Even though the fertilization rate, number of high quality embryos, available embryo rate, and high quality embryo rate were comparable between these two groups, the cumulative live birth rate was significantly lower in P level elevation patients compared with non-elevation patients (Table 5).

Like the situation in poor ovarian responders, univariate logistic regression analysis in intermediate ovarian responders also showed that most parameters, including serum P level, pooled into the analysis were associated with cumulative live birth rate. However, in multivariate logistic regression analysis, serum P level was still significantly associated with cumulative live birth rate (Table 4).

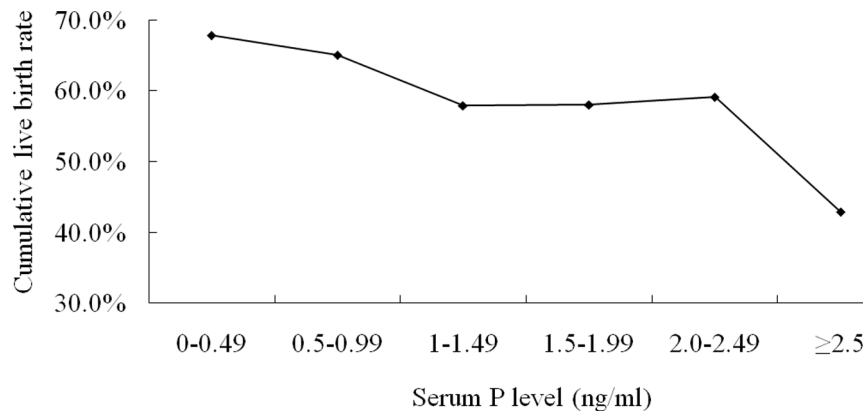

**Figure 2.** Relationship between serum P level on the day of HCG administration and cumulative live birth rate per oocyte retrieval cycle in intermediate ovarian responders (6≤ retrieved oocytes ≤19).

doi:10.1371/journal.pone.0100011.g002

**Table 5.** Patients' characteristics and cycle outcomes in intermediate ovarian responders ( $6 \leq$  retrieved oocytes  $\leq 19$ ) with and without P elevation ( $\geq 2.24$  ng/ml) on day of HCG administration.

|                                | Non-elevated P (n = 2912) | Elevated P (n = 153) | P value |
|--------------------------------|---------------------------|----------------------|---------|
| Age (y)                        | 30.4 $\pm$ 4.5            | 31.6 $\pm$ 4.3       | 0.001   |
| BMI (Kg/m <sup>2</sup> )       | 22.2 $\pm$ 3.0            | 22.0 $\pm$ 2.9       | NS      |
| Duration of infertility (y)    | 4.6 $\pm$ 3.2             | 5.1 $\pm$ 3.4        | 0.041   |
| Basal FSH (IU/L)               | 7.6 $\pm$ 2.2             | 7.0 $\pm$ 1.8        | 0.002   |
| Gn duration (days)             | 11.2 $\pm$ 2.0            | 11.4 $\pm$ 2.2       | NS      |
| Gn dosage (IU)                 | 2170 $\pm$ 817            | 2705 $\pm$ 942       | 0.000   |
| Peak E <sub>2</sub> (pg/ml)    | 5747 $\pm$ 2862           | 7391 $\pm$ 3403      | 0.000   |
| Peak LH (IU/L)                 | 2.0 $\pm$ 1.2             | 1.7 $\pm$ 3.0        | NS      |
| No. of retrieved oocytes       | 11.5 $\pm$ 3.6            | 12.3 $\pm$ 3.4       | 0.007   |
| Fertilization rate (%)         | 68.1 $\pm$ 18.8           | 68.8 $\pm$ 18.6      | NS      |
| No. of available embryos       | 6.3 $\pm$ 3.1             | 6.8 $\pm$ 3.3        | 0.034   |
| No. of high quality embryos    | 5.3 $\pm$ 3.1             | 5.4 $\pm$ 3.1        | NS      |
| Available embryo rate (%)      | 55.0 $\pm$ 21.2           | 56.3 $\pm$ 22.6      | NS      |
| High quality embryo rate (%)   | 46.1 $\pm$ 22.6           | 44.3 $\pm$ 22.9      | NS      |
| Cumulative live birth rate (%) | 1837/2912 (63.1%)         | 72/152 (47.1%)       | 0.000   |

Note: values are the mean  $\pm$  SD unless otherwise noted. NS, not significant.

BMI, body mass index; FSH, follicular stimulation hormone; Gn, gonadotropin; E<sub>2</sub>, estrogen; LH, luteinizing hormone.

doi:10.1371/journal.pone.0100011.t005

### High ovarian responders

For high ovarian responders (n = 482), the cumulative live birth rate also decreased with the increase of serum P level, especially when serum P level  $\geq 2.50$  ng/mL (Figure 3). Patients' basic information and clinical parameters are showed in table 5. The gonadotropin dose and peak E<sub>2</sub> level were significantly higher in patients with serum P level elevation ( $P \geq 2.50$  ng/mL). No differences were detected in the number of oocytes retrieved, fertilization rate, number of available embryos, number of high quality embryos, available embryo rate, and high quality embryo rate. However, the cumulative live birth rate was significantly lower in the group with serum P level elevation (Table 6).

By univariate logistic regression analysis, factors associated with cumulative live birth rate included duration of infertility, fertilization rate, number of available embryos, number of high

quality embryos, available embryo rate, high quality embryo rate, and serum P level. The inverse association between serum P level and cumulative live birth rate remained significant after adjustment for confounding factors which was found to be associated with cumulative live birth rate by univariate analysis (Table 4).

### Discussion

Serum P elevation on the day of HCG administration, which was considered as premature luteinization in earlier studies, has been found to be more likely due to an accumulation from a large number of follicles [16]. Unlike most previous studies that simply assessed the relationship between serum P level and IVF/ICSI outcome in the overall patients, recent studies have realized that it is reasonable to divide patients into different groups according to ovarian response [10]. In addition, another study has shown that it

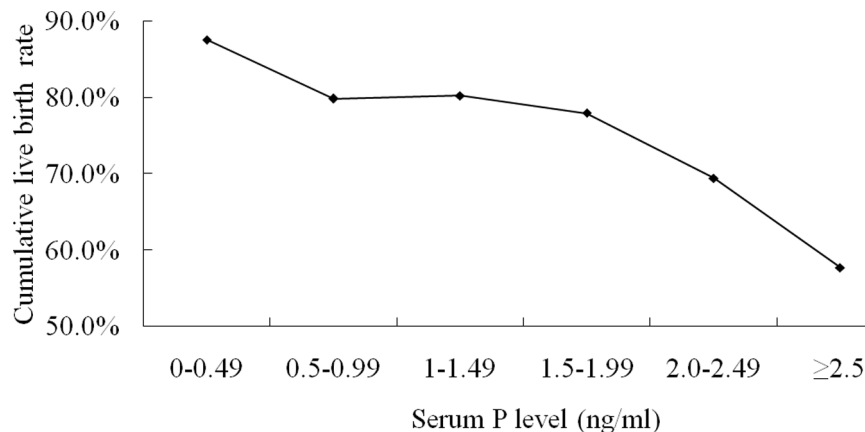

**Figure 3.** Relationship between serum P level on the day of HCG administration and cumulative live birth rate per oocyte retrieval cycle in high ovarian responders (retrieved oocytes  $\geq 20$ ).

doi:10.1371/journal.pone.0100011.g003

**Table 6.** Patients' characteristics and cycle outcomes in high ovarian responders (retrieved oocytes  $\geq 20$ ) with and without P elevation ( $\geq 2.50$  ng/ml) on day of HCG administration.

|                                | Non-elevated P (n = 456) | Elevated P (n = 26) | P value |
|--------------------------------|--------------------------|---------------------|---------|
| Age (y)                        | 28.9 $\pm$ 4.0           | 29.8 $\pm$ 3.8      | NS      |
| BMI (Kg/m <sup>2</sup> )       | 22.3 $\pm$ 3.1           | 21.2 $\pm$ 2.0      | NS      |
| Duration of infertility (y)    | 4.2 $\pm$ 2.9            | 5.0 $\pm$ 3.3       | NS      |
| Basal FSH (IU/L)               | 6.6 $\pm$ 1.6            | 6.4 $\pm$ 1.5       | NS      |
| Gn duration (days)             | 11.0 $\pm$ 1.6           | 10.9 $\pm$ 2.6      | NS      |
| Gn dosage (IU)                 | 1795 $\pm$ 515           | 2343 $\pm$ 760      | 0.000   |
| Peak E <sub>2</sub> (pg/ml)    | 9810 $\pm$ 3530          | 12848 $\pm$ 4360    | 0.000   |
| Peak LH (IU/L)                 | 1.5 $\pm$ 0.7            | 1.2 $\pm$ 0.8       | NS      |
| No. of retrieved oocytes       | 24.6 $\pm$ 5.7           | 25.0 $\pm$ 4.1      | NS      |
| Fertilization rate (%)         | 62.7 $\pm$ 16.2          | 61.4 $\pm$ 15.4     | NS      |
| No. of available embryos       | 12.0 $\pm$ 4.9           | 12.8 $\pm$ 5.1      | NS      |
| No. of high quality embryos    | 10.1 $\pm$ 5.0           | 9.8 $\pm$ 5.2       | NS      |
| Available embryo rate (%)      | 49.3 $\pm$ 18.2          | 50.8 $\pm$ 17.5     | NS      |
| High quality embryo rate (%)   | 41.6 $\pm$ 19.5          | 39.2 $\pm$ 19.3     | NS      |
| Cumulative live birth rate (%) | 360/456 (78.9%)          | 15/26 (57.7%)       | 0.025   |

Note: values are the mean  $\pm$  SD unless otherwise noted. NS, not significant.

BMI, body mass index; FSH, follicular stimulation hormone; Gn, gonadotropin; E<sub>2</sub>, estrogen; LH, luteinizing hormone.

doi:10.1371/journal.pone.0100011.t006

is also important to explore the association between the duration of serum P elevation before HCG administration, but not just an absolute cutoff value of P level, and IVF/ICSI outcome [16]. However, irrespective of research methodology each study used, most scholars have reached a consensus on the adverse impact of serum P elevation on IVF/ICSI outcome.

From the patient's point of view, the most valuable parameter for them is the cumulative live birth rate per oocyte retrieval cycle, which is much similar as 'taking baby home' rate. For clinicians, cumulative live birth rate per oocyte retrieval cycle is also more meaningful as it gives us the opportunity to track the final clinical outcome by taking into account the outcomes of fresh as well as frozen embryos derived from the same oocyte retrieval cycle [17,18]. The present large cohort study, which includes 4,651 patients undergoing their first IVF/ICSI cycle, demonstrates that cumulative live birth rate per oocyte retrieval cycle was significantly decreased in patients with serum P elevation, independent of the ovarian response.

It is known that endometrial receptivity and oocyte/embryo quality are two main factors associated with implantation [19]. The next question is how the elevated serum P level adversely affects IVF/ICSI outcome. Does serum P elevation only affect endometrial receptivity in fresh transfer cycles as most studies have been shown? Or the quality of oocytes resulting from the fresh cycles has also been compromised?

Among a large amount studies concerning the relationship between serum P elevation and IVF/ICSI outcome, some of them reported that the serum P elevation changes the implantation window rather than embryo quality, evidenced by oocyte donation cycles [20]. Most recently, a large retrospective study including more than 10,000 cycles also demonstrated no relationship between elevated P level and oocyte quality in all responders, as the fertilization rate, cleavage rate were comparable between P elevation and non-elevation groups. In addition, the study also showed that the ongoing pregnancy rate seemed to be much better in FET cycles than that in fresh cycles for women with elevated

serum P level [10]. However, there was also a prospective study that directly showed high estrogen during IVF reducing implantation rate by affecting embryonic adhesion. High estrogen concentration, which also means high P levels as shown by our study, reduced both endometrial receptivity and embryo quality [21].

For all patients included into this study, the number of oocytes retrieved seemed to be higher in serum P elevation group compared with that in non-elevation group. However, the laboratory parameters in this study showed no better results for serum P elevation patients, especially in poor responders. What is more, the high quality embryo ratio was lower in serum P elevation group, although the difference did not reach statistical significant. All these results indicate that the oocyte quality may also be adversely affected by serum P elevation. In addition, the significantly reduced cumulative live birth rate in elevated serum P level patients with different response also indirectly supported this hypothesis.

There are also some limitations in the present study. Even though we evaluated the relationship between serum P level and cumulative live birth rate in different responders, which is an effective way to control for confounding factors, the retrospective nature of the study that may have led to bias in the interpretation of the data. Another limitation is that our data have no direct evidence to show the oocyte quality being adversely affected in serum P elevated patients. In this study, we used embryo morphology as our embryo scoring criteria, which may not really represent the 'real quality' of embryos [22,23].

Taken together, our large retrospective, single-center study showed that serum P elevation on the day of HCG administration during IVF/ICSI-ET adversely affects the cumulative live birth rate per oocyte retrieval cycle in patients with different ovarian response. The effect of P elevation on embryo quality deserves more intensive study.



## Acknowledgements

The authors would like to thank all the staff from Reproductive Medical Center, First

Affiliated Hospital of Zhengzhou University. We also would like to thank Yujing Xiong for her critically reading of the manuscript and helpful discussion.

## References

- Doldi N, Marsiglio E, Destefani A, Gessi A, Merati G, et al. (1999) Elevated serum progesterone on the day of HCG administration in IVF is associated with a higher pregnancy rate in polycystic ovary syndrome. *Hum Reprod* 14: 601–605.
- Silverberg KM, Martin M, Olive DL, Burns WN, Schenken RS (1994) Elevated serum progesterone levels on the day of human chorionic gonadotropin administration in in vitro fertilization cycles do not adversely affect embryo quality. *Fertil Steril* 61: 508–513.
- Papanikolaou EG, Kolibianakis EM, Pozzobon C, Tank P, Tournaye H, et al. (2009) Progesterone rise on the day of human chorionic gonadotropin administration impairs pregnancy outcome in day 3 single-embryo transfer, while has no effect on day 5 single blastocyst transfer. *Fertil Steril* 91: 949–952.
- Bosch E, Labarta E, Crespo J, Simon C, Remohi J, et al. (2010) Circulating progesterone levels and ongoing pregnancy rates in controlled ovarian stimulation cycles for in vitro fertilization: analysis of over 4000 cycles. *Hum Reprod* 25: 2092–2100.
- Venetis CA, Kolibianakis EM, Bosdou JK, Tarlatzis BC (2013) Progesterone elevation and probability of pregnancy after IVF: a systematic review and meta-analysis of over 60 000 cycles. *Hum Reprod Update* 19: 433–457.
- Segal S, Glatstein I, McShane P, Hotamisligil S, Ezcurra D, et al. (2009) Premature luteinization and in vitro fertilization outcome in gonadotropin/ gonadotropin-releasing hormone antagonist cycles in women with polycystic ovary syndrome. *Fertil Steril* 91: 1755–1759.
- Li R, Qiao J, Wang L, Zhen X, Lu Y (2008) Serum progesterone concentration on day of HCG administration and IVF outcome. *Reprod Biomed Online* 16: 627–631.
- Labarta E, Martínez-Concejero JA, Alama P, Horcajadas JA, Pellicer A, et al. (2011) Endometrial receptivity is affected in women with high circulating progesterone levels at the end of the follicular phase: a functional genomics analysis. *Hum Reprod* 26: 1813–1825.
- Shapiro BS, Daneshmand ST, Garner FC, Aguirre M, Hudson C, et al. (2011) Evidence of impaired endometrial receptivity after ovarian stimulation for in vitro fertilization: a prospective randomized trial comparing fresh and frozen-thawed embryo transfers in high responders. *Fertil Steril* 96: 516–518.
- Xu B, Li Z, Zhang H, Jin L, Li Y, et al. (2012) Serum progesterone level effects on the outcome of in vitro fertilization in patients with different ovarian response: an analysis of more than 10,000 cycles. *Fertil Steril* 97: 1321–1327.
- Griesinger G, Mannaerts B, Andersen CY, Witjes H, Kolibianakis EM, et al. (2013) Progesterone elevation does not compromise pregnancy rates in high responders: a pooled analysis of in vitro fertilization patients treated with recombinant follicle-stimulating hormone/gonadotropin-releasing hormone antagonist in six trials. *Fertil Steril* 100: 1622–1628.
- García-Velasco JA, Bermejo A, Ruiz F, Martínez-Salazar J, Requena A, et al. (2011) Cycle scheduling with oral contraceptive pills in the GnRH antagonist protocol vs the long protocol: a randomized, controlled trial. *Fertil Steril* 96: 590–593.
- Zhang HJ, Song XR, Lu R, Xue FX (2012) Modified super-long down-regulation protocol improves fertilization and pregnancy in patients with poor ovarian responses. *Chin Med J (Engl)* 125: 2837–2840.
- Balaban B, Urman B, Isiklar A, Alatas C, Aksoy S, et al. (2001) The effect of pronuclear morphology on embryo quality parameters and blastocyst transfer outcome. *Hum Reprod* 16: 2357–2361.
- Zhang YL, Sun J, Su YC, Guo YH, Sun YP (2013) Ectopic pregnancy in frozen-thawed embryo transfer: a retrospective analysis of 4,034 cycles and related factors. *Syst Biol Reprod Med* 59: 34–37.
- Huang CC, Lien YR, Chen HF, Chen MJ, Shieh CJ, et al. (2012) The duration of pre-ovulatory serum progesterone elevation before hCG administration affects the outcome of IVF/ICSI cycles. *Hum Reprod* 27: 2036–2045.
- Li HW, Lee VC, Lau EY, Yeung WS, Ho PC, et al. (2013) Role of baseline antral follicle count and anti-Müllerian hormone in prediction of cumulative live birth in the first in vitro fertilisation cycle: a retrospective cohort analysis. *PLoS One* 8: e61095.
- Garrido N, Bellver J, Remohi J, Simon C, Pellicer A (2011) Cumulative live-birth rates per total number of embryos needed to reach newborn in consecutive in vitro fertilization (IVF) cycles: a new approach to measuring the likelihood of IVF success. *Fertil Steril* 96: 40–46.
- Roque M, Lattes K, Serra S, Sola I, Geber S, et al. (2013) Fresh embryo transfer versus frozen embryo transfer in in vitro fertilization cycles: a systematic review and meta-analysis. *Fertil Steril* 99: 156–162.
- Melo M, Meseguer M, Garrido N, Bosch E, Pellicer A, et al. (2006) The significance of premature luteinization in an oocyte-donation programme. *Human Reproduction* 21: 1503–1507.
- Valbuena D, Martin J, de Pablo JL, Remohi J, Pellicer A, et al. (2001) Increasing levels of estradiol are deleterious to embryonic implantation because they directly affect the embryo. *Fertil Steril* 76: 962–968.
- Kotze DJ, Hansen P, Keskinetepe L, Snowden E, Sher G, et al. (2010) Embryo selection criteria based on morphology VERSUS the expression of a biochemical marker (sHLA-G) and a graduated embryo score: prediction of pregnancy outcome. *Journal of assisted reproduction and genetics* 27: 309–316.
- Forman EJ, Tao X, Ferry KM, Taylor D, Treff NR, et al. (2012) Single embryo transfer with comprehensive chromosome screening results in improved ongoing pregnancy rates and decreased miscarriage rates. *Human reproduction* 27: 1217–1222.

## Author Contributions

Conceived and designed the experiments: ZB FZ. Performed the experiments: ZB KW. Analyzed the data: KW. Contributed reagents/materials/analysis tools: ZB YG Y. Su JZ. Contributed to the writing of the manuscript: ZB. Supervised this study and obtained funding: Y. Sun.
